# Supplementary material
Source: Elsevier journal article supplement (https://www.sciencedirect.com/science/article/pii/S0213911122001078)
Supplement: mmc1 [file S0213911122001078:mmc1.pdf]

## Encuesta a los Registros de Mortalidad Estructura, recursos y funciones

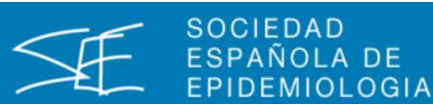

Encuesta a los Registros de Mortalidad para conocer el perfil de sus profesionales, la estructura dónde se ubican, y las funcionalidades que realizan. La información suministrada se presentará siempre de forma agregada y sin que se pueda llegar individualizar por registro o persona.

**Institución (detallar)** \_\_\_\_\_

(Ejemplo: Consejería de Sanidad Universal, Dirección Gral. de Salud Pública y Adicciones, Servicio de Epidemiología, Unidad de Estadísticas de Mortalidad).

### Convenio INE - Movimiento Natural de la Población (marcar lo que proceda)

- ☐ INE con la Consejería de Sanidad
- ☐ INE con la Consejería de Estadística. Y Acuerdo Consejería de Estadística con la Consejería de Sanidad
- ☐ Otro \_\_\_\_\_

### Relación funcional autonómica de Estadística con Sanidad

¿Ley de Estadística propia? Citar la referencia bibliográfica \_\_\_\_\_

(Ej. Ley 6/2002, de 25 de junio, de estadística de la Región de Murcia. Boletín Oficial de la Región de Murcia, de 9 de julio de 2002, núm. 157, pp. 10381 a 10390).

### Perfil equipo del registro\*

|                           | Codificador/a A | Codificador/a B | Codificador/a C | Codificador/a D | Responsable |
|---------------------------|-----------------|-----------------|-----------------|-----------------|-------------|
| Grado enfermería/medicina |                 |                 |                 |                 |             |
| Sexo (Mujer / Hombre)     |                 |                 |                 |                 |             |
| Años en registro          |                 |                 |                 |                 |             |
| Años para la jubilación   |                 |                 |                 |                 |             |

\* De estar ausente alguna persona, cumplimentarla en su lugar.

- ☐ Gestor de datos. Describir actividad (¿a tiempo parcial?) \_\_\_\_\_
- ☐ Estadístico. Describir actividad (¿a tiempo parcial?) \_\_\_\_\_
- ☐ Administrativa/o. Describir actividad (¿a tiempo parcial?) \_\_\_\_\_
- ☐ Otros profesionales. Indicar: \_\_\_\_\_

### Mejora de la información

Criterios para mejora de la calidad. Detallar: \_\_\_\_\_

Acceso a la historia clínica digital (marcar todas las necesarias).

- ☐ Todos los hospitales públicos / concertados (Servicio Autonómico de Salud).
- ☐ Todos los hospitales privados en la Comunidad Autónoma.

## Encuesta a los Registros de Mortalidad Estructura, recursos y funciones



*Encuesta a los Registros de Mortalidad para conocer el perfil de sus profesionales, la estructura dónde se ubican, y las funcionalidades que realizan. La información suministrada se presentará siempre de forma agregada y sin que se pueda llegar individualizar por registro o persona.*

Algún hospital privado en la Comunidad Autónoma.

☐ Con pacientes de MUJEJU o MUFACE o ISFAS.

☐ Sin pacientes MUJEJU o, MUFACE o ISFAS.

☐ Indicar el nº de consultas a la historia clínica digital en el último año (indicar ambos): Nº \_\_\_\_\_ / Año \_\_\_\_\_.

### Formación médica

Indicar las fechas de las últimas clases \_\_\_\_\_; nº de alumnos respectivos por clase \_\_\_\_\_;  
y especialidad/es médica/s del alumnado \_\_\_\_\_.

**Difusión de la más reciente de la estadística anual / varios años** (marcar todo lo que proceda)

☐ Portal propio de internet.

☐ Soporte papel

☐ Ambos

☐ Publicación regular

☐ Publicación esporádica

☐ Otros. Indicar \_\_\_\_\_

¿Último año de estadísticas de mortalidad publicado? Indicar título y la referencia bibliográfica \_\_\_\_\_

(Ejemplo: Estadísticas Básicas de Mortalidad en la Región de Murcia en 2018. Disponible en:  
[http://econet.carm.es/web/crem/inicio/-/crem/sicrem/PU\\_mortalidadBasica/Indice110.html](http://econet.carm.es/web/crem/inicio/-/crem/sicrem/PU_mortalidadBasica/Indice110.html)

☐ Recuento tabulado de casos de causas de defunción

☐ indicadores resumen absolutos.

☐ indicadores resumen relativos (% , razones, tasas, etc.).

☐ indicadores relativos comparables (% , razones, tasas, etc., estandarizadas; esperanza de vida...).

**Responsable del Registro.** Nombre y apellidos \_\_\_\_\_

Dirección y código postal del trabajo \_\_\_\_\_

Teléfono / móvil \_\_\_\_\_ Correo electrónico \_\_\_\_\_

**¡Gracias por las respuestas y la devolución por correo!**
